# Supplementary material
Source: publisher figshare collection journal article supplement (https://future-science-group.figshare.com/ndownloader/files/29092593)
Supplement: Supplementary file 1 [file 29092593]

Supplemental Table 2 Selection of the optimal cluster number

| Cluster number (K) | Calinski-  Harabasz | Silhouette index |
| --- | --- | --- |
| 2 | 250.1869 | 0.3148 |
| 3 | 214.1375 | 0.2520 |
| 4 | 178.1196 | 0.2107 |
| 5 | 149.2907 | 0.1862 |
| 6 | 141.5434 | 0.2045 |
| 7 | 130.7541 | 0.1919 |
| 8 | 117.9310 | 0.1815 |
